# Supplementary material
Source: MDPI journal article supplement (https://www.mdpi.com/2073-4395/12/5/1042)
Supplement: s1 [file s1 › agronomy-1632780-supplementary.pdf]

## Supplementary information

# Restoration of Rice Ecosystem Services: ‘Ecological Engineering for Pest Management’ Incentives and Practices in the Mekong Delta Region of Vietnam

Finbarr G. Horgan <sup>1,2,3,\*</sup>, Quynh Vu <sup>4,5,6</sup>, Enrique A. Mundaca <sup>2</sup> and Eduardo Crisol-Martínez <sup>1,2,7</sup>

<sup>1</sup> EcoLaVerna Integral Restoration Ecology, Bridestown, Kildinan, T56 P499 County Cork, Ireland;

<sup>2</sup> Escuela de Agronomía, Facultad de Ciencias Agrarias y Forestales, Universidad Católica del Maule, Casilla 7-D, Curicó 3349001, Chile; emundaca@gmail.com

<sup>3</sup> Centre for Pesticide Suicide Prevention, University/BHF Centre for Cardiovascular Science, University of Edinburgh, Edinburgh EH16 4TJ, UK

<sup>4</sup> Cuulong Delta Rice Research Institute, Tan Thanh, Thoi Lai District, Can Tho 905660, Vietnam; vquynh@gmail.com

<sup>5</sup> Helmholtz Centre for Environmental Research — UFZ, Theodor-Lieser-Str. 4, 06120 Halle, Germany

<sup>6</sup> International Rice Research Institute, Makati 1226, Manila, Philippines

<sup>7</sup> COEXPHAL (Association of Vegetable and Fruit Growers of Almeria), Carretera de Ronda 11, 04004 Almeria, Spain; eduardocrisol@gmail.com

\* Correspondence: f.horgan@ecolaverna.org

**Table S1.** Profiles of farmers from southern Vietnam that practice conventional rice farming and that incorporate, or have incorporated in the past, ecological engineering for pest management

| Responses                        | Conventional <sup>1</sup> | Current-EE <sup>1</sup> | Former-EE <sup>1</sup> | L-R $\chi^2$ -statistic <sup>2</sup> |
|----------------------------------|---------------------------|-------------------------|------------------------|--------------------------------------|
| Males (%)                        | 91.6                      | 97                      | 92.3                   | 3.741 <sup>ns</sup>                  |
| Age (years)                      | 49.73±0.88                | 48.41±1.07              | 52.26±1.75             | 0.649 <sup>ns</sup>                  |
| Education attained (%)           |                           |                         |                        |                                      |
| (i) Primary                      | 25.2                      | 27.8                    | 28.2                   | 6.376 <sup>ns</sup>                  |
| (ii) Secondary                   | 52.4                      | 49.6                    | 35.9                   |                                      |
| (iii) Secondary (high)           | 21.0                      | 21.1                    | 33.3                   |                                      |
| (iv) College                     | 0.7                       | 1.5                     | 2.6                    |                                      |
| (v) University                   | 0.7                       | 0.0                     | 0.0                    |                                      |
| Mainly dedicated to rice (%)     | 90.9                      | 94.0                    | 97.4                   | 2.324 <sup>ns</sup>                  |
| Rice-growing experience (years)  | 24.18±1.02                | 26.17±1.01              | 28.23±1.65             | 2.180 <sup>ns</sup>                  |
| Area of rice fields (ha)         | 1.53±0.12 <sup>a</sup>    | 1.84±0.17 <sup>ab</sup> | 2.48±0.60 <sup>b</sup> | 3.303 <sup>*</sup>                   |
| Own land (%)                     | 97.2                      | 98.5                    | 100                    | 1.481 <sup>ns</sup>                  |
| Grow other crops on farm (%)     | 14.7                      | 19.5                    | 12.8                   | 1.622 <sup>ns</sup>                  |
| Maintain livestock on farm (%)   | 34.3                      | 42.1                    | 38.5                   | 1.798 <sup>ns</sup>                  |
| Diversified farm (%)             | 45.5                      | 55.6                    | 48.7                   | 2.896 <sup>ns</sup>                  |
| Have other sources of income (%) | 69.2                      | 74.4                    | 69.2                   | 1.020 <sup>ns</sup>                  |
| Operate a business (%)           | 28.7                      | 24.1                    | 25.6                   | 0.767 <sup>ns</sup>                  |
| N                                | 143                       | 133                     | 39                     |                                      |

<sup>1</sup>: means with the same letters indicate homogenous groups based on Tukey pairwise comparisons; <sup>2</sup>: ns =  $p > 0.05$ , \* =  $p \leq 0.05$ ;  $\chi^2$  degrees of freedom = 2 (8 for education); for parametric analyses, F degrees of freedom = 2,312.

**Table S2.** Management of bund vegetation by farmers in south Vietnam and motivations for choosing bund plants

| Responses                               | Conventional | Current-EE  | Former-EE   | L-R $\chi^2$ - statistic <sup>1</sup> |
|-----------------------------------------|--------------|-------------|-------------|---------------------------------------|
| Weeds removed (%)                       | 55.9         | 67.7        | 66.7        | 4.404 <sup>ns</sup>                   |
| Herbicide used (%)                      | 38.5         | 37.6        | 41.0        | 0.150 <sup>ns</sup>                   |
| Weeds as forage (%)                     | 23.1         | 15.8        | 12.8        | 3.425 <sup>ns</sup>                   |
| Planted species richness                |              | 2.83±0.14   | 2.13±0.19   | 2.033 <sup>ns</sup>                   |
| Planted vegetable richness              |              | 0.72±0.09   | 0.46±0.12   | 2.192 <sup>ns</sup>                   |
| Planted flower richness                 |              | 1.50±0.11   | 1.67±0.17   | 0.462 <sup>ns</sup>                   |
| Reason behind plant choice (%)          |              |             |             |                                       |
| (i) Easy or inexpensive                 |              | 12.8 (64.7) | 20.5 (62.9) | 27.463***                             |
| (ii) Landscape related                  |              | 42.9 (58.6) | 35.9 (42.9) |                                       |
| (iii) Profits and uses                  |              | 40.6 (40.6) | 12.8 (14.3) |                                       |
| (iv) Recommended                        |              | 3.8 (36.8)  | 30.8 (31.4) |                                       |
| Coordination of activities (%)          |              |             |             |                                       |
| (i) Community coordination              |              | 51.0        | 18.2        | 10.068**                              |
| (ii) Based on rice sowing/planting      |              | 12.0        | 9.1         |                                       |
| (iii) Same time as rice sowing/planting |              | 14.0        | 27.3        |                                       |
| (iv) Individual basis                   |              | 23.0        | 45.5        |                                       |

1: ns =  $p > 0.05$ , \*\*\* =  $p \leq 0.001$ ;  $\chi^2$  degrees of freedom = 3

**Table S3.** Flowering plants used as part of ecological engineering for pest management in the Mekong Delta Region of southern Vietnam. Numbers are percentages of farmers who indicated that they planted corresponding species.

| Plant species | Scientific names                                  | Current-EE | Former-EE | Total | L-R $\chi^2$ - statistic <sup>1</sup> |
|---------------|---------------------------------------------------|------------|-----------|-------|---------------------------------------|
| Vegetables    |                                                   |            |           |       |                                       |
| Lady finger   | <i>Abelmoschus esculentus</i> (L.) Moench         | 36.1       | 10.3      | 30.2  | 9.542 <sup>ns</sup>                   |
| Mung bean     | <i>Vigna radiata</i> (L.) R. Wilczek              | 14.3       | 10.3      | 13.4  | 0.423 <sup>ns</sup>                   |
| Sesame        | <i>Sesamum indicum</i> L.                         | 10.5       | 15.4      | 11.6  | 0.693 <sup>ns</sup>                   |
| Chili         | <i>Capsicum</i> spp.                              | 6.8        | 0.0       | 5.2   | 2.785 <sup>ns</sup>                   |
| Squash        | <i>Cucurbita</i> spp.                             | 6.8        | 0.0       | 5.2   | 2.785 <sup>ns</sup>                   |
| Bitter melon  | <i>Momordica</i> spp.                             | 5.3        | 2.6       | 4.7   | 0.495 <sup>ns</sup>                   |
| Eggplant      | <i>Solanum melongena</i> L.                       | 5.3        | 0.0       | 4.1   | 2.140 <sup>ns</sup>                   |
| Cucumber      | <i>Cucumis sativus</i> L.                         | 4.5        | 2.6       | 4.1   | 0.293 <sup>ns</sup>                   |
| Gourd         | <i>Lagenaria</i> spp.                             | 4.5        | 2.6       | 4.1   | 0.293 <sup>ns</sup>                   |
| Watermelon    | <i>Citrullus lanatus</i> (Thunb.) Matsum. & Nakai | 0.0        | 2.6       | 0.6   | 3.430 <sup>ns</sup>                   |
| Blackbean     | <i>Phaseolus</i> spp.                             | 0.8        | 0.0       | 0.6   | 0.295 <sup>ns</sup>                   |
| Ginger        | <i>Zingiber officinale</i> Roscoe                 | 0.8        | 0.0       | 0.6   | 0.295 <sup>ns</sup>                   |
| Stringbean    | <i>Vigna unguiculata</i> (L.) Walp.               | 0.8        | 0.0       | 0.6   | 0.295 <sup>ns</sup>                   |
| Cinnamon      | <i>Cinnamomum verum</i> J.Presi                   | 0.8        | 0.0       | 0.6   | 0.295 <sup>ns</sup>                   |
| Flowers       |                                                   |            |           |       |                                       |
| Cosmos        | <i>Cosmos</i> spp.                                | 78.9       | 71.8      | 77.3  | 0.880 <sup>ns</sup>                   |
| Butter daisy  | <i>Melampodium</i> spp.                           | 32.3       | 35.9      | 33.1  | 0.173 <sup>ns</sup>                   |
| Sunflower     | <i>Helianthus annuus</i> L.                       | 26.3       | 25.6      | 26.2  | 0.007 <sup>ns</sup>                   |
| Marigold      | <i>Tagetes</i> spp.                               | 14.3       | 20.5      | 15.7  | 0.884 <sup>ns</sup>                   |
| Lantana       | <i>Lantana camara</i> L.                          | 13.5       | 2.6       | 11.0  | 3.693*                                |
| Blackjack     | <i>Bidens pilosa</i> L.                           | 5.3        | 2.6       | 4.7   | 0.495 <sup>ns</sup>                   |
| Wild pea      | <i>Macroptilium lathyroides</i> (L.) Urb.         | 1.5        | 2.6       | 1.7   | 0.198 <sup>ns</sup>                   |
| Zizania       | <i>Chrysogonum peruvianum</i> L.                  | 2.3        | 0.0       | 1.7   | 0.895 <sup>ns</sup>                   |
| Dahlias       | <i>Dahlia pinnata</i> Cav.                        | 1.5        | 2.6       | 1.7   | 0.198 <sup>ns</sup>                   |
| Jasmine       | <i>Jasminum</i> spp.                              | 0.8        | 0.0       | 0.6   | 0.295 <sup>ns</sup>                   |
| Other plants  |                                                   |            |           |       |                                       |
| Weeds         |                                                   | 5.3        | 0.0       | 4.1   | 2.140 <sup>ns</sup>                   |
| Mango         | <i>Mangifera indica</i> L.                        | 0.8        | 0.0       | 0.6   | 0.295 <sup>ns</sup>                   |
| Eucalyptus    | <i>Eucalyptus</i> spp.                            | 0.8        | 0.0       | 0.6   | 0.295 <sup>ns</sup>                   |
| Cajaput       | <i>Melaleuca</i> spp.                             | 0.8        | 0.0       | 0.6   | 0.295 <sup>ns</sup>                   |

<sup>1</sup>: ns =  $p > 0.05$ , \* =  $p \leq 0.05$

**Table S4.** Farmer responses to questions about their satisfaction with ecological engineering. Numbers are percentages of farmers associated with each response.

| Responses                           | Current-EE | Former-EE | Total | L-R $\chi^2$ - statistic <sup>1</sup> |
|-------------------------------------|------------|-----------|-------|---------------------------------------|
| Satisfied with results?             |            |           |       |                                       |
| (i) Yes                             | 61.7       | 22.6      |       | 37.448***                             |
| (ii) Somewhat                       | 32.5       | 22.6      |       |                                       |
| (iii) No                            | 5.8        | 54.8      |       |                                       |
| Why satisfied?                      |            |           |       |                                       |
| (i) Pest, disease or weed reduction | 47.1       | 69.2      | 49.6  | 2.318 <sup>ns</sup>                   |
| (ii) Improved environment           | 49         | 38.5      | 47.8  | 0.520 <sup>ns</sup>                   |
| (iii) Reduced costs                 | 47.1       | 15.4      | 43.5  | 5.250 <sup>ns</sup>                   |
| (iv) Increased profits              | 30.4       | 30.8      | 30.4  | 0.001 <sup>ns</sup>                   |
| (v) Improved wellbeing              | 24.5       | 15.4      | 23.5  | 0.581 <sup>ns</sup>                   |
| (vi) Technical support available    | 2.0        | 0.0       | 1.7   | 0.484 <sup>ns</sup>                   |
| Why dissatisfied?                   |            |           |       |                                       |
| (i) Difficult to implement          | 47.8       | 41.7      | 45.7  | 0.242 <sup>ns</sup>                   |
| (ii) Increased costs                | 26.1       | 50.0      | 34.3  | 3.932*                                |
| (iii) Difficult to coordinate       | 17.4       | 16.7      | 17.1  | 0.006 <sup>ns</sup>                   |
| (iv) Increased rats                 | 8.7        | 16.7      | 11.4  | 0.946 <sup>ns</sup>                   |
| (v) Herbicide burn                  | 13.0       | 4.2       | 10.0  | 1.574 <sup>ns</sup>                   |
| (vi) Obstruction of drainage        | 8.7        | 0.0       | 5.7   | 3.484 <sup>ns</sup>                   |
| (vii) Theft of produce              | 0.0        | 8.3       | 2.9   | 4.396*                                |

<sup>1</sup>: ns =  $p > 0.05$ , \* =  $p \leq 0.05$ , \*\*\* =  $p \leq 0.001$

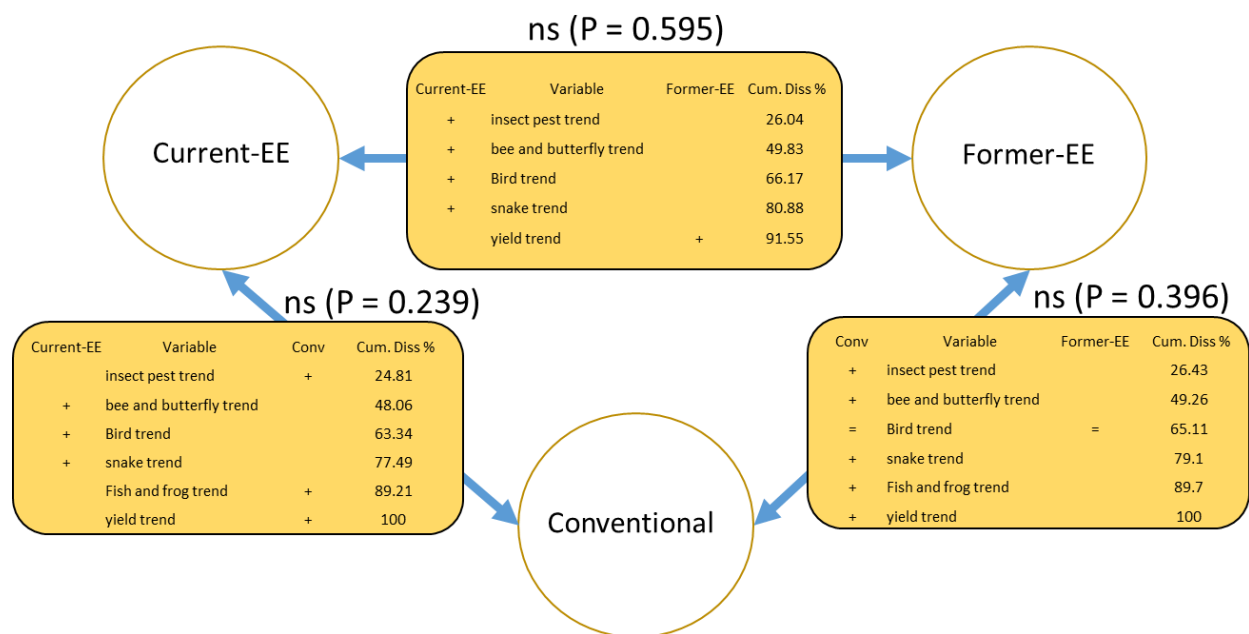

**Figure S1.** Differences between farmers' perception about the trends of biodiversity, rice pests and yields, based on rice management (in circles). PERMANOVA pair-wise analyses are shown. SIMPER analyses (in orange boxes) show the variables contributing most to the dissimilarity between each pair of groups. The '+' symbols indicate the group in which each variable is more prevalent. 'Cum. Diss %' = cumulative dissimilarity between pairs, expressed as a percentage.

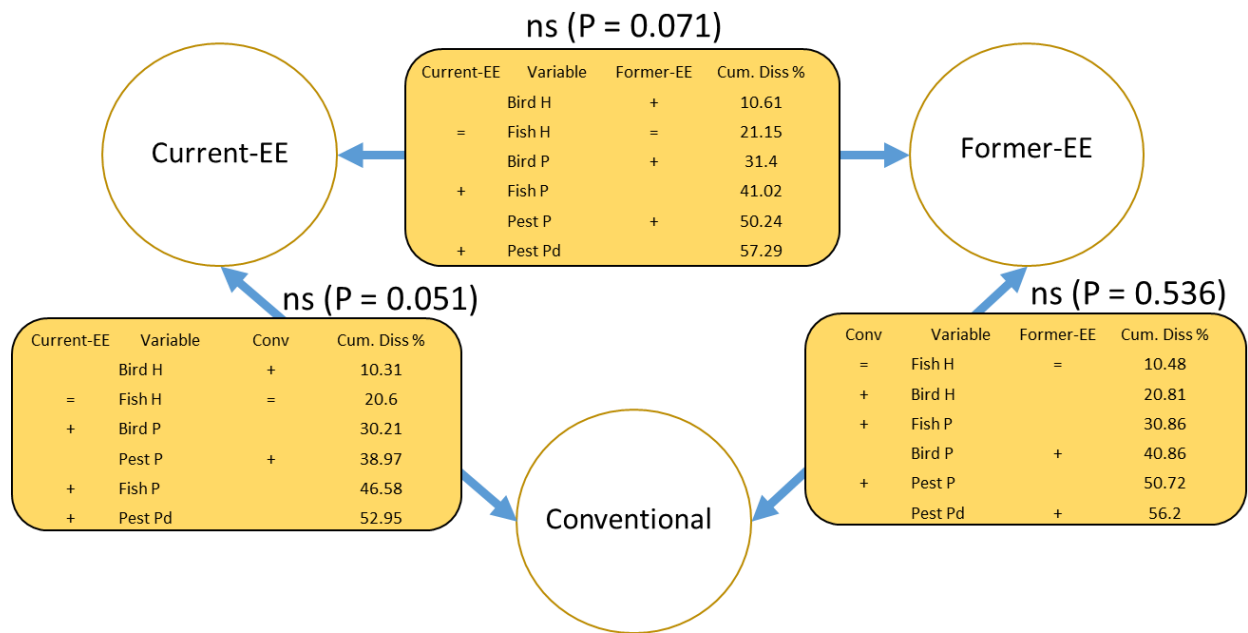

**Figure S2.** Differences between farmers' perception about the declining trends of biodiversity, based on rice management (in circles). PERMANOVA pair-wise analyses are shown. SIMPER analyses (in orange boxes) show the variables (an animal group followed by a letter indicating the reason behind the trend: 'H' = decline due to hunting; 'P' = decline due to pesticides; 'Pd' = increase due to pesticides) that contributed most to the dissimilarity between each pair of groups. The '+' symbols indicate the group in which each variable is more prevalent. 'Cum. Diss %' = cumulative dissimilarity between pairs, expressed as a percentage.
